# Supplementary material for: A glimpse on the pattern of rodent diversification: a phylogenetic approach
Source: PubMed Central journal article supplement (PMC3532383; doi:10.1186/1471-2148-12-88), 2012-06-14

LEGEND:

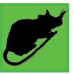

MYOMORPHA (MY)

- Di : Dipodoidea
- Mr : Muroidea
- Sp : Spalacidae
- Cl : Calomyscidae
- Mu : Muridae
- De : Deomyinae
- Ge : Gerbillinae
- Lo : Lophiomyinae
- Mn : Murinae
- Cr : Cricetidae
- Cn : Cricetinae
- Si : Sigmodontinae
- Ty : Tylomyinae

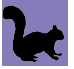

SCIUROIDEA

- Sc : Sciuridae
- Su : Sciurinae
- Cu : Callosciurinae
- Xe : Xerinae
- Gl : Gliridae

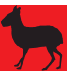

CAVIOMORPHA

- Ct : Ctenodactylidae + Diatomyidae
- Hy : Hystricidae
- Ba : Bathyergidae, (Petromuridae, Thryonomyidae)
- Cv : Caviomorpha
- Di : Dinomyidae + Chinchillidae

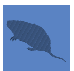

CASTORIMORPHA

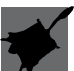

ANOMALURO MORPHA (AN)

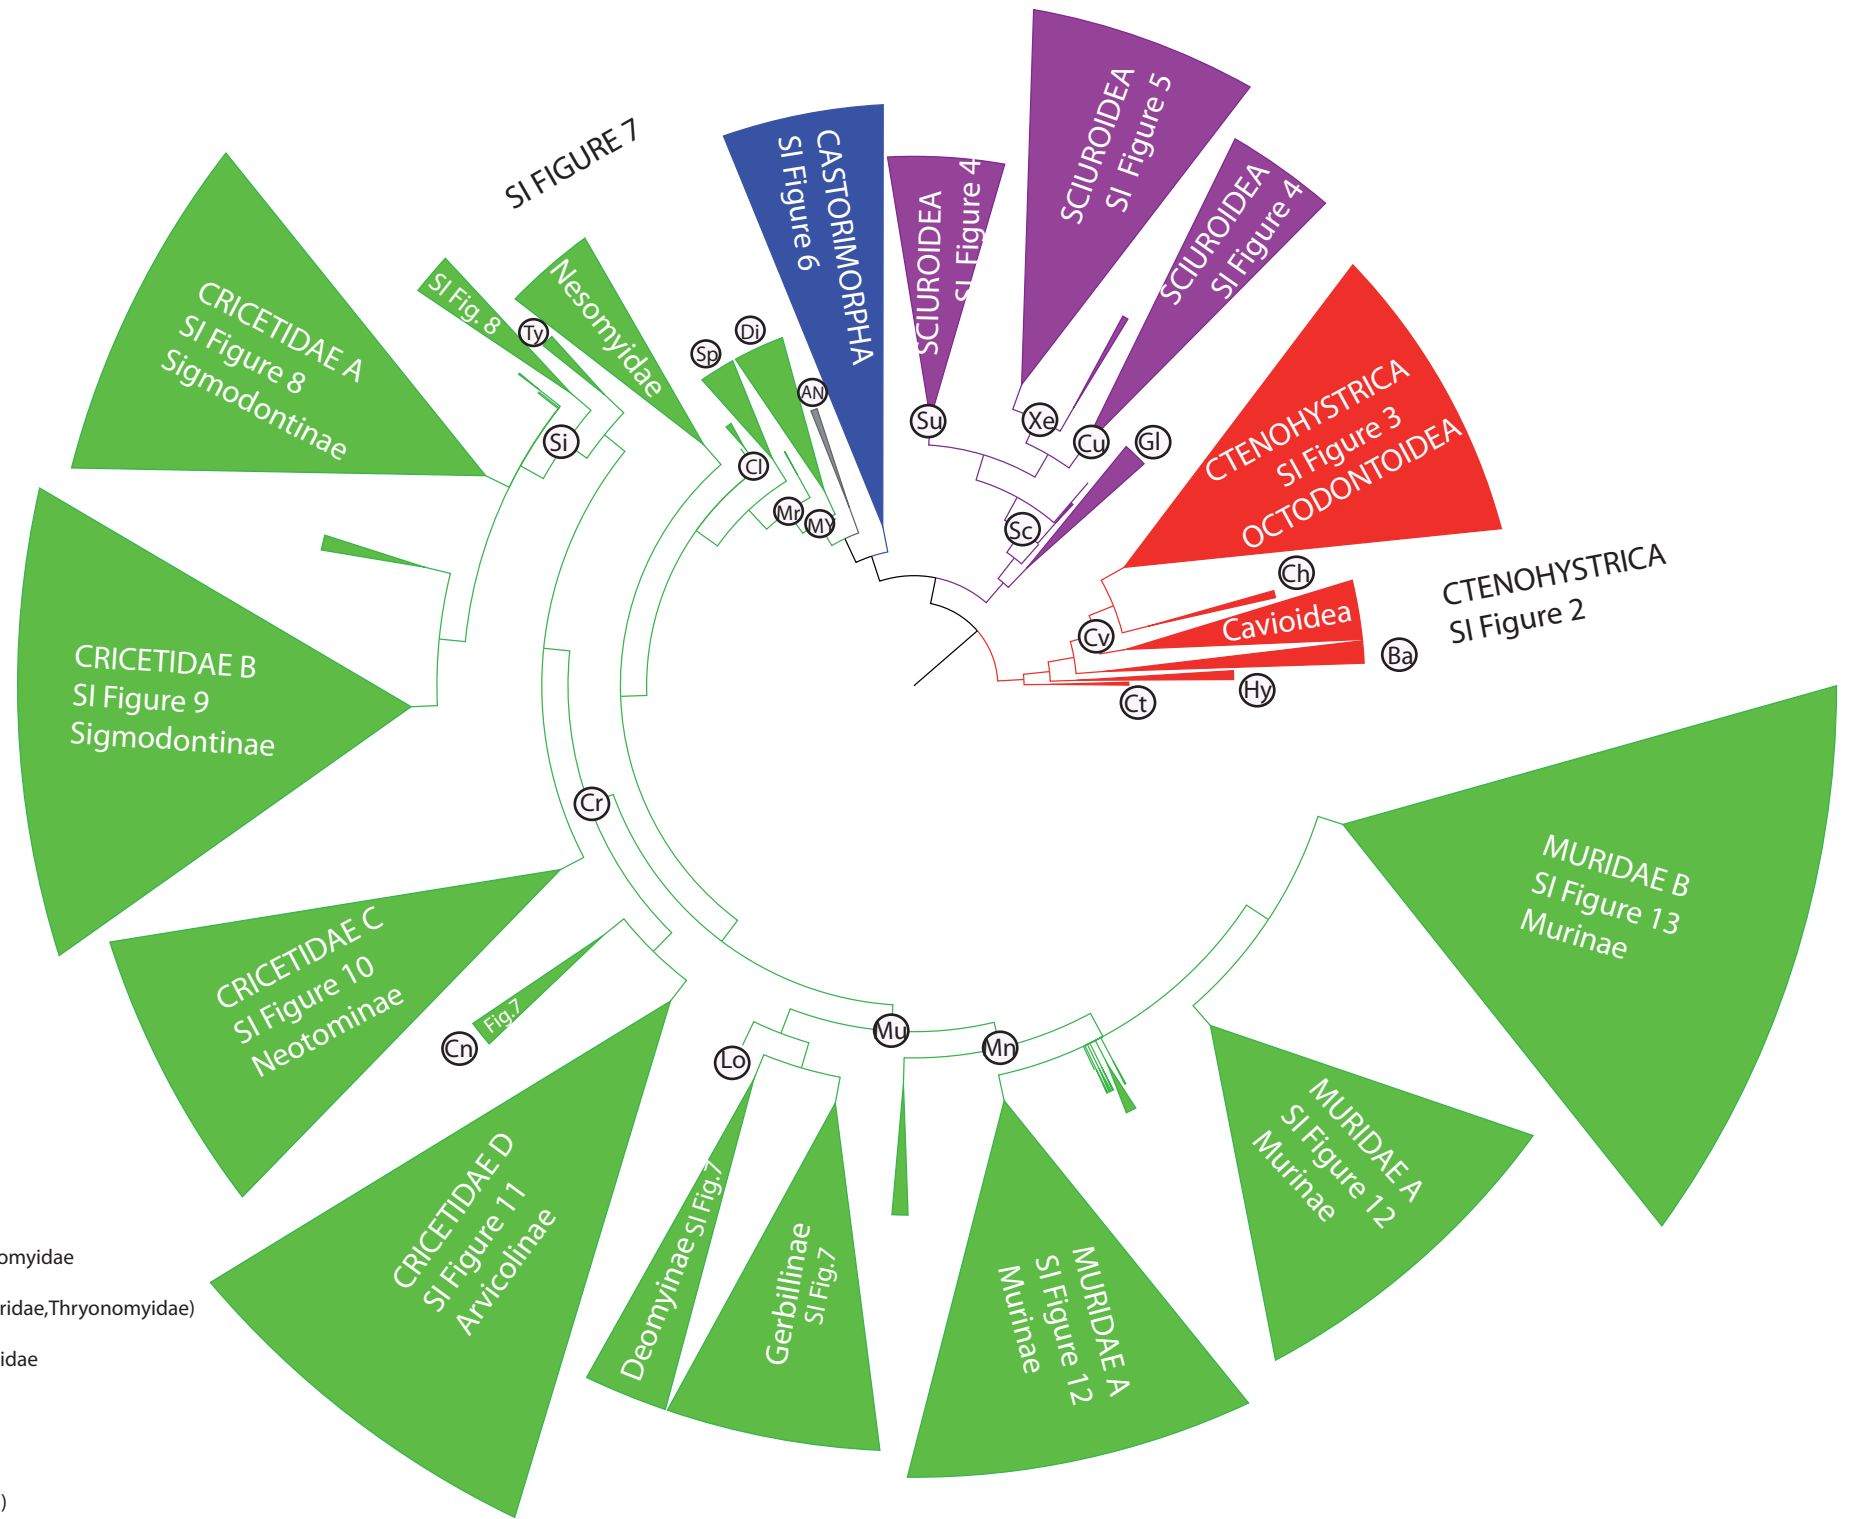

Supplement: 1471-2148-12-88-S1.pdf [file 1471-2148-12-88-S1.pdf]
