# Supplementary material for: A glimpse on the pattern of rodent diversification: a phylogenetic approach
Source: PubMed Central journal article supplement (PMC3532383; doi:10.1186/1471-2148-12-88), 2012-06-14
Supplement: 1471-2148-12-88-S4.pdf [file 1471-2148-12-88-S4.pdf]

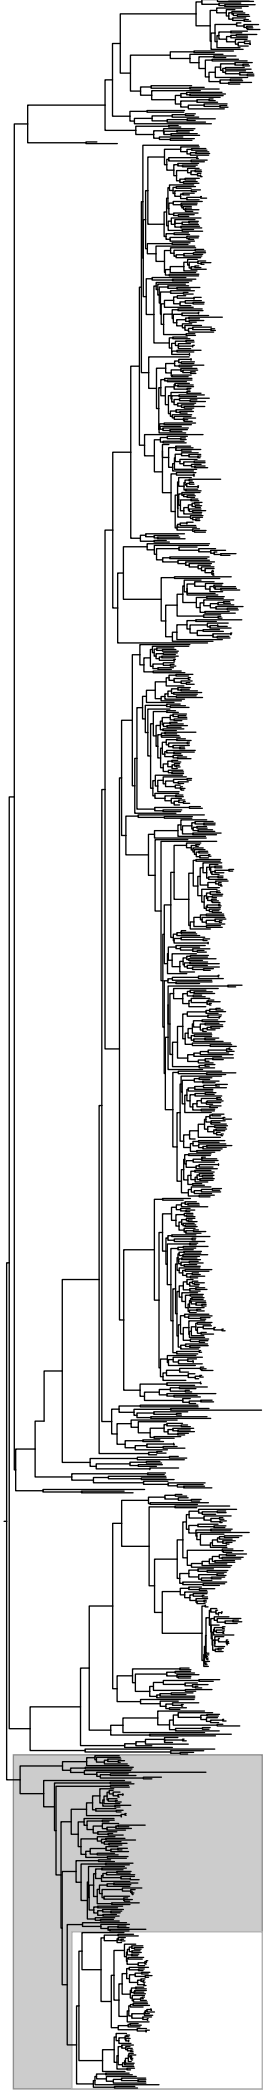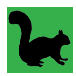

**SCIUROIDEA**

- Bootstrap  $\geq$  95
- 70  $\leq$  Bootstrap < 95
- 50  $\leq$  Bootstrap < 70

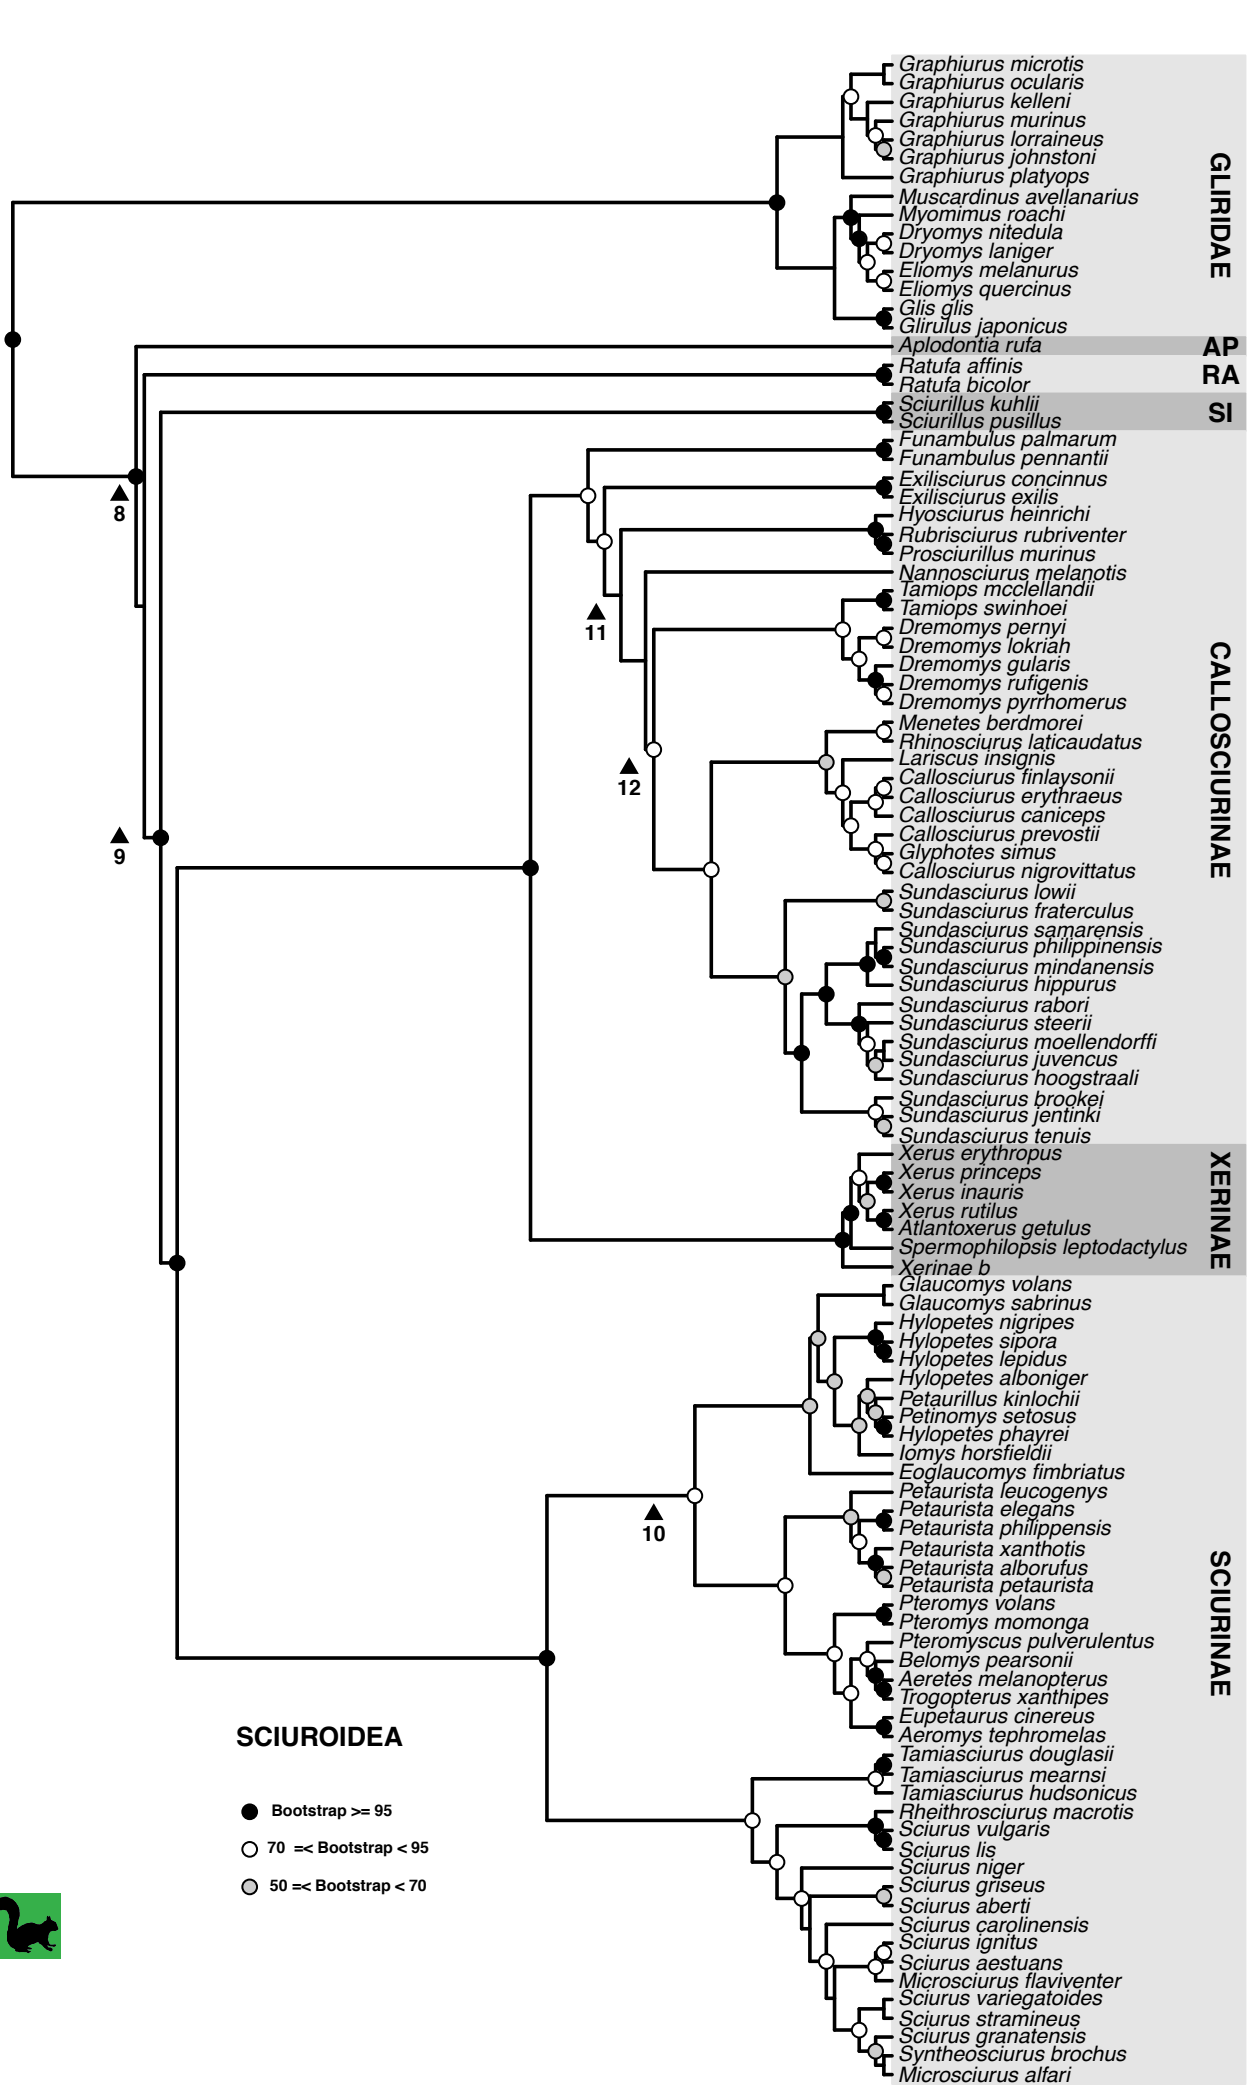

|                                      | CYTB | IREP | 12S | GHR | RCAG1 | RCO3 | WVF | ND4 | RCAG1 | ND1 | ND1P |
|--------------------------------------|------|------|-----|-----|-------|------|-----|-----|-------|-----|------|
| <i>Graphiurus microtis</i>           | ■    | ■    | ■   | ■   | ■     | ■    | ■   | ■   | ■     | ■   | ■    |
| <i>Graphiurus ocellaris</i>          | ■    | ■    | ■   | ■   | ■     | ■    | ■   | ■   | ■     | ■   | ■    |
| <i>Graphiurus kelleni</i>            | ■    | ■    | ■   | ■   | ■     | ■    | ■   | ■   | ■     | ■   | ■    |
| <i>Graphiurus murinus</i>            | ■    | ■    | ■   | ■   | ■     | ■    | ■   | ■   | ■     | ■   | ■    |
| <i>Graphiurus lorraineus</i>         | ■    | ■    | ■   | ■   | ■     | ■    | ■   | ■   | ■     | ■   | ■    |
| <i>Graphiurus johnstoni</i>          | ■    | ■    | ■   | ■   | ■     | ■    | ■   | ■   | ■     | ■   | ■    |
| <i>Graphiurus platyops</i>           | ■    | ■    | ■   | ■   | ■     | ■    | ■   | ■   | ■     | ■   | ■    |
| <i>Muscardinus avellanarius</i>      | ■    | ■    | ■   | ■   | ■     | ■    | ■   | ■   | ■     | ■   | ■    |
| <i>Myomimus roachi</i>               | ■    | ■    | ■   | ■   | ■     | ■    | ■   | ■   | ■     | ■   | ■    |
| <i>Dryomys nitedula</i>              | ■    | ■    | ■   | ■   | ■     | ■    | ■   | ■   | ■     | ■   | ■    |
| <i>Dryomys laniger</i>               | ■    | ■    | ■   | ■   | ■     | ■    | ■   | ■   | ■     | ■   | ■    |
| <i>Elomys melanurus</i>              | ■    | ■    | ■   | ■   | ■     | ■    | ■   | ■   | ■     | ■   | ■    |
| <i>Elomys quercinus</i>              | ■    | ■    | ■   | ■   | ■     | ■    | ■   | ■   | ■     | ■   | ■    |
| <i>Glis glis</i>                     | ■    | ■    | ■   | ■   | ■     | ■    | ■   | ■   | ■     | ■   | ■    |
| <i>Glirulus japonicus</i>            | ■    | ■    | ■   | ■   | ■     | ■    | ■   | ■   | ■     | ■   | ■    |
| <i>Aplodontia rufa</i>               | ■    | ■    | ■   | ■   | ■     | ■    | ■   | ■   | ■     | ■   | ■    |
| <i>Ratufa affinis</i>                | ■    | ■    | ■   | ■   | ■     | ■    | ■   | ■   | ■     | ■   | ■    |
| <i>Ratufa bicolor</i>                | ■    | ■    | ■   | ■   | ■     | ■    | ■   | ■   | ■     | ■   | ■    |
| <i>Sciurillus kuhiji</i>             | ■    | ■    | ■   | ■   | ■     | ■    | ■   | ■   | ■     | ■   | ■    |
| <i>Sciurillus pusillus</i>           | ■    | ■    | ■   | ■   | ■     | ■    | ■   | ■   | ■     | ■   | ■    |
| <i>Funambulus palmarum</i>           | ■    | ■    | ■   | ■   | ■     | ■    | ■   | ■   | ■     | ■   | ■    |
| <i>Funambulus pennantii</i>          | ■    | ■    | ■   | ■   | ■     | ■    | ■   | ■   | ■     | ■   | ■    |
| <i>Exilisciurus concinnus</i>        | ■    | ■    | ■   | ■   | ■     | ■    | ■   | ■   | ■     | ■   | ■    |
| <i>Exilisciurus exilis</i>           | ■    | ■    | ■   | ■   | ■     | ■    | ■   | ■   | ■     | ■   | ■    |
| <i>Hyosciurus heinrichi</i>          | ■    | ■    | ■   | ■   | ■     | ■    | ■   | ■   | ■     | ■   | ■    |
| <i>Rubrisciurus rubriventer</i>      | ■    | ■    | ■   | ■   | ■     | ■    | ■   | ■   | ■     | ■   | ■    |
| <i>Prosciurillus murinus</i>         | ■    | ■    | ■   | ■   | ■     | ■    | ■   | ■   | ■     | ■   | ■    |
| <i>Nannosciurus melanotis</i>        | ■    | ■    | ■   | ■   | ■     | ■    | ■   | ■   | ■     | ■   | ■    |
| <i>Tamiops mclellandii</i>           | ■    | ■    | ■   | ■   | ■     | ■    | ■   | ■   | ■     | ■   | ■    |
| <i>Tamiops swinhoei</i>              | ■    | ■    | ■   | ■   | ■     | ■    | ■   | ■   | ■     | ■   | ■    |
| <i>Dremomys pernyi</i>               | ■    | ■    | ■   | ■   | ■     | ■    | ■   | ■   | ■     | ■   | ■    |
| <i>Dremomys lokriah</i>              | ■    | ■    | ■   | ■   | ■     | ■    | ■   | ■   | ■     | ■   | ■    |
| <i>Dremomys gularis</i>              | ■    | ■    | ■   | ■   | ■     | ■    | ■   | ■   | ■     | ■   | ■    |
| <i>Dremomys rufigenis</i>            | ■    | ■    | ■   | ■   | ■     | ■    | ■   | ■   | ■     | ■   | ■    |
| <i>Dremomys pyrrhomerus</i>          | ■    | ■    | ■   | ■   | ■     | ■    | ■   | ■   | ■     | ■   | ■    |
| <i>Menetes berdmorei</i>             | ■    | ■    | ■   | ■   | ■     | ■    | ■   | ■   | ■     | ■   | ■    |
| <i>Rhinosciurus laticaudatus</i>     | ■    | ■    | ■   | ■   | ■     | ■    | ■   | ■   | ■     | ■   | ■    |
| <i>Lariscus insignis</i>             | ■    | ■    | ■   | ■   | ■     | ■    | ■   | ■   | ■     | ■   | ■    |
| <i>Callosciurus finlaysonii</i>      | ■    | ■    | ■   | ■   | ■     | ■    | ■   | ■   | ■     | ■   | ■    |
| <i>Callosciurus erythraeus</i>       | ■    | ■    | ■   | ■   | ■     | ■    | ■   | ■   | ■     | ■   | ■    |
| <i>Callosciurus caniceps</i>         | ■    | ■    | ■   | ■   | ■     | ■    | ■   | ■   | ■     | ■   | ■    |
| <i>Callosciurus prevostii</i>        | ■    | ■    | ■   | ■   | ■     | ■    | ■   | ■   | ■     | ■   | ■    |
| <i>Glyphotes simus</i>               | ■    | ■    | ■   | ■   | ■     | ■    | ■   | ■   | ■     | ■   | ■    |
| <i>Callosciurus nigrovittatus</i>    | ■    | ■    | ■   | ■   | ■     | ■    | ■   | ■   | ■     | ■   | ■    |
| <i>Sundasciurus lowii</i>            | ■    | ■    | ■   | ■   | ■     | ■    | ■   | ■   | ■     | ■   | ■    |
| <i>Sundasciurus fraterculus</i>      | ■    | ■    | ■   | ■   | ■     | ■    | ■   | ■   | ■     | ■   | ■    |
| <i>Sundasciurus samarensis</i>       | ■    | ■    | ■   | ■   | ■     | ■    | ■   | ■   | ■     | ■   | ■    |
| <i>Sundasciurus philippinensis</i>   | ■    | ■    | ■   | ■   | ■     | ■    | ■   | ■   | ■     | ■   | ■    |
| <i>Sundasciurus mindanensis</i>      | ■    | ■    | ■   | ■   | ■     | ■    | ■   | ■   | ■     | ■   | ■    |
| <i>Sundasciurus hippurus</i>         | ■    | ■    | ■   | ■   | ■     | ■    | ■   | ■   | ■     | ■   | ■    |
| <i>Sundasciurus rabori</i>           | ■    | ■    | ■   | ■   | ■     | ■    | ■   | ■   | ■     | ■   | ■    |
| <i>Sundasciurus steerii</i>          | ■    | ■    | ■   | ■   | ■     | ■    | ■   | ■   | ■     | ■   | ■    |
| <i>Sundasciurus moellendorffi</i>    | ■    | ■    | ■   | ■   | ■     | ■    | ■   | ■   | ■     | ■   | ■    |
| <i>Sundasciurus juvenicus</i>        | ■    | ■    | ■   | ■   | ■     | ■    | ■   | ■   | ■     | ■   | ■    |
| <i>Sundasciurus hoogstraali</i>      | ■    | ■    | ■   | ■   | ■     | ■    | ■   | ■   | ■     | ■   | ■    |
| <i>Sundasciurus brookei</i>          | ■    | ■    | ■   | ■   | ■     | ■    | ■   | ■   | ■     | ■   | ■    |
| <i>Sundasciurus jentinki</i>         | ■    | ■    | ■   | ■   | ■     | ■    | ■   | ■   | ■     | ■   | ■    |
| <i>Sundasciurus tenuis</i>           | ■    | ■    | ■   | ■   | ■     | ■    | ■   | ■   | ■     | ■   | ■    |
| <i>Xerus erythropus</i>              | ■    | ■    | ■   | ■   | ■     | ■    | ■   | ■   | ■     | ■   | ■    |
| <i>Xerus princeps</i>                | ■    | ■    | ■   | ■   | ■     | ■    | ■   | ■   | ■     | ■   | ■    |
| <i>Xerus inauris</i>                 | ■    | ■    | ■   | ■   | ■     | ■    | ■   | ■   | ■     | ■   | ■    |
| <i>Xerus rutilus</i>                 | ■    | ■    | ■   | ■   | ■     | ■    | ■   | ■   | ■     | ■   | ■    |
| <i>Atlantoxerus getulus</i>          | ■    | ■    | ■   | ■   | ■     | ■    | ■   | ■   | ■     | ■   | ■    |
| <i>Spermophilopsis leptodactylus</i> | ■    | ■    | ■   | ■   | ■     | ■    | ■   | ■   | ■     | ■   | ■    |
| <i>Xerinae b</i>                     | ■    | ■    | ■   | ■   | ■     | ■    | ■   | ■   | ■     | ■   | ■    |
| <i>Glaucomys volans</i>              | ■    | ■    | ■   | ■   | ■     | ■    | ■   | ■   | ■     | ■   | ■    |
| <i>Glaucomys sabrinus</i>            | ■    | ■    | ■   | ■   | ■     | ■    | ■   | ■   | ■     | ■   | ■    |
| <i>Hylopetes nigripes</i>            | ■    | ■    | ■   | ■   | ■     | ■    | ■   | ■   | ■     | ■   | ■    |
| <i>Hylopetes sipora</i>              | ■    | ■    | ■   | ■   | ■     | ■    | ■   | ■   | ■     | ■   | ■    |
| <i>Hylopetes lepidus</i>             | ■    | ■    | ■   | ■   | ■     | ■    | ■   | ■   | ■     | ■   | ■    |
| <i>Hylopetes albioniger</i>          | ■    | ■    | ■   | ■   | ■     | ■    | ■   | ■   | ■     | ■   | ■    |
| <i>Petaurillus kinlochii</i>         | ■    | ■    | ■   | ■   | ■     | ■    | ■   | ■   | ■     | ■   | ■    |
| <i>Petinomys setosus</i>             | ■    | ■    | ■   | ■   | ■     | ■    | ■   | ■   | ■     | ■   | ■    |
| <i>Hylopetes phayrei</i>             | ■    | ■    | ■   | ■   | ■     | ■    | ■   | ■   | ■     | ■   | ■    |
| <i>Iomys horsfieldii</i>             | ■    | ■    | ■   | ■   | ■     | ■    | ■   | ■   | ■     | ■   | ■    |
| <i>Eoglaucomys fimbriatus</i>        | ■    | ■    | ■   | ■   | ■     | ■    | ■   | ■   | ■     | ■   | ■    |
| <i>Petaurista leucogenys</i>         | ■    | ■    | ■   | ■   | ■     | ■    | ■   | ■   | ■     | ■   | ■    |
| <i>Petaurista elegans</i>            | ■    | ■    | ■   | ■   | ■     | ■    | ■   | ■   | ■     | ■   | ■    |
| <i>Petaurista philippensis</i>       | ■    | ■    | ■   | ■   | ■     | ■    | ■   | ■   | ■     | ■   | ■    |
| <i>Petaurista xanthotis</i>          | ■    | ■    | ■   | ■   | ■     | ■    | ■   | ■   | ■     | ■   | ■    |
| <i>Petaurista alborufus</i>          | ■    | ■    | ■   | ■   | ■     | ■    | ■   | ■   | ■     | ■   | ■    |
| <i>Petaurista petaurista</i>         | ■    | ■    | ■   | ■   | ■     | ■    | ■   | ■   | ■     | ■   | ■    |
| <i>Pteromys volans</i>               | ■    | ■    | ■   | ■   | ■     | ■    | ■   | ■   | ■     | ■   | ■    |
| <i>Pteromys momonga</i>              | ■    | ■    | ■   | ■   | ■     | ■    | ■   | ■   | ■     | ■   | ■    |
| <i>Pteromyscus pulverulentus</i>     | ■    | ■    | ■   | ■   | ■     | ■    | ■   | ■   | ■     | ■   | ■    |
| <i>Belomys pearsonii</i>             | ■    | ■    | ■   | ■   | ■     | ■    | ■   | ■   | ■     | ■   | ■    |
| <i>Aeretes melanopterus</i>          | ■    | ■    | ■   | ■   | ■     | ■    | ■   | ■   | ■     | ■   | ■    |
| <i>Trogopterus xanthipes</i>         | ■    | ■    | ■   | ■   | ■     | ■    | ■   | ■   | ■     | ■   | ■    |
| <i>Eupetaurus cinereus</i>           | ■    | ■    | ■   | ■   | ■     | ■    | ■   | ■   | ■     | ■   | ■    |
| <i>Aeromys tephromelas</i>           | ■    | ■    | ■   | ■   | ■     | ■    | ■   | ■   | ■     | ■   | ■    |
| <i>Tamiasciurus douglasii</i>        | ■    | ■    | ■   | ■   | ■     | ■    | ■   | ■   | ■     | ■   | ■    |
| <i>Tamiasciurus mearnsi</i>          | ■    | ■    | ■   | ■   | ■     | ■    | ■   | ■   | ■     | ■   | ■    |
| <i>Tamiasciurus hudsonicus</i>       | ■    | ■    | ■   | ■   | ■     | ■    | ■   | ■   | ■     | ■   | ■    |
| <i>Rheithrosciurus macrotis</i>      | ■    | ■    | ■   | ■   | ■     | ■    | ■   | ■   | ■     | ■   | ■    |
| <i>Sciurus vulgaris</i>              | ■    | ■    | ■   | ■   | ■     | ■    | ■   | ■   | ■     | ■   | ■    |
| <i>Sciurus lis</i>                   | ■    | ■    | ■   | ■   | ■     | ■    | ■   | ■   | ■     | ■   | ■    |
| <i>Sciurus niger</i>                 | ■    | ■    | ■   | ■   | ■     | ■    | ■   | ■   | ■     | ■   | ■    |
| <i>Sciurus griseus</i>               | ■    | ■    | ■   | ■   | ■     | ■    | ■   | ■   | ■     | ■   | ■    |
| <i>Sciurus aberti</i>                | ■    | ■    | ■   | ■   | ■     | ■    | ■   | ■   | ■     | ■   | ■    |
| <i>Sciurus carolinensis</i>          | ■    | ■    | ■   | ■   | ■     | ■    | ■   | ■   | ■     | ■   | ■    |
| <i>Sciurus ignitus</i>               | ■    | ■    | ■   | ■   | ■     | ■    | ■   | ■   | ■     | ■   | ■    |
| <i>Sciurus aestuans</i>              | ■    | ■    | ■   | ■   | ■     | ■    | ■   | ■   | ■     | ■   | ■    |
| <i>Microsciurus flaviventer</i>      | ■    | ■    | ■   | ■   | ■     | ■    | ■   | ■   | ■     | ■   | ■    |
| <i>Sciurus variegatoides</i>         | ■    | ■    | ■   | ■   | ■     | ■    | ■   | ■   | ■     | ■   | ■    |
| <i>Sciurus stramineus</i>            | ■    | ■    | ■   | ■   | ■     | ■    | ■   | ■   | ■     | ■   | ■    |
| <i>Sciurus granatensis</i>           | ■    | ■    | ■   | ■   | ■     | ■    | ■   | ■   | ■     | ■   | ■    |
| <i>Syntheosciurus brochus</i>        | ■    | ■    | ■   | ■   | ■     | ■    | ■   | ■   | ■     | ■   | ■    |
| <i>Microsciurus alfari</i>           | ■    | ■    | ■   | ■   | ■     | ■    | ■   | ■   | ■     | ■   | ■    |

**GLIRIDAE**

**APRA**  
**SI**

**CALLOSCIURINAE**

**XERINAE**

**SCURINAE**
