# Supplementary material for: A glimpse on the pattern of rodent diversification: a phylogenetic approach
Source: PubMed Central journal article supplement (PMC3532383; doi:10.1186/1471-2148-12-88), 2012-06-14
Supplement: 1471-2148-12-88-S6.pdf [file 1471-2148-12-88-S6.pdf]

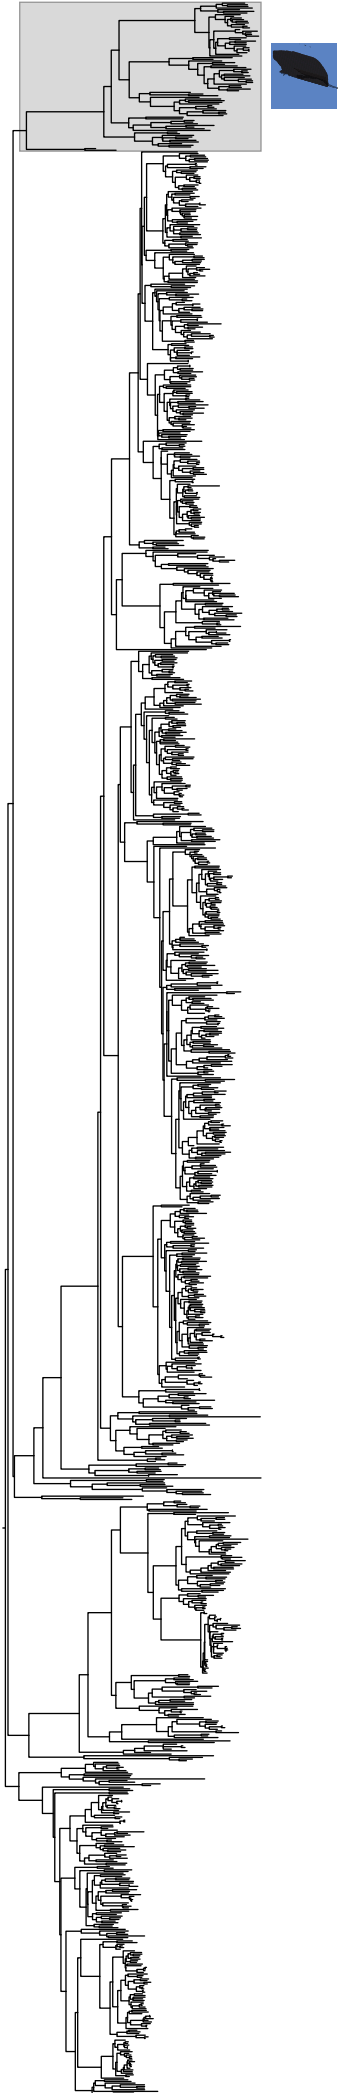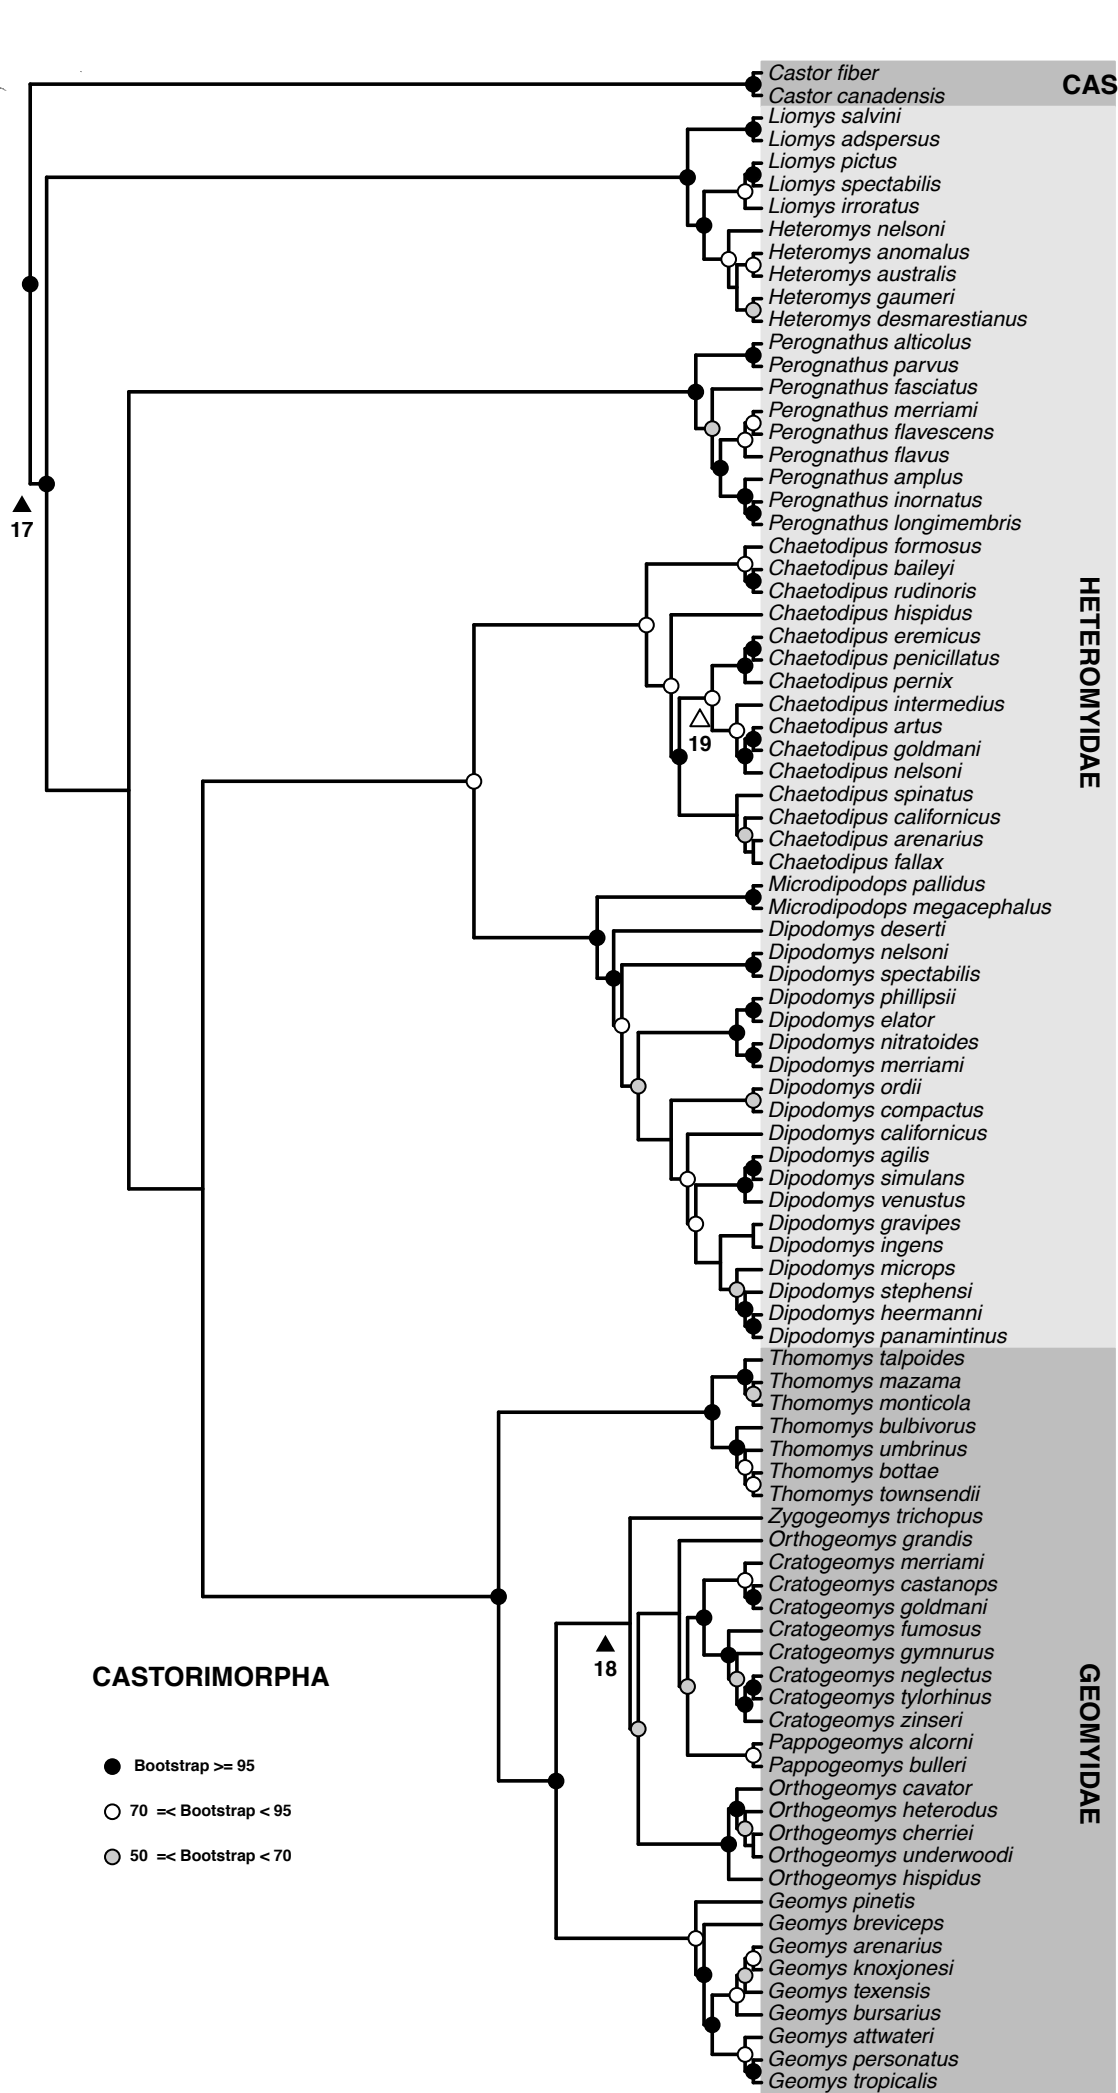

| Species                    | CYT B | IRBP | 12S | GHR | RAG1 | CO3 | VWF | NDA | BRCA1 | ND1 | DLOOP |
|----------------------------|-------|------|-----|-----|------|-----|-----|-----|-------|-----|-------|
| Castor fiber               | ■     | ■    | ■   | ■   | ■    | ■   | ■   | ■   | ■     | ■   | ■     |
| Castor canadensis          | ■     | ■    | ■   | ■   | ■    | ■   | ■   | ■   | ■     | ■   | ■     |
| Liomys salvini             | ■     | ■    | ■   | ■   | ■    | ■   | ■   | ■   | ■     | ■   | ■     |
| Liomys adspersus           | ■     | ■    | ■   | ■   | ■    | ■   | ■   | ■   | ■     | ■   | ■     |
| Liomys pictus              | ■     | ■    | ■   | ■   | ■    | ■   | ■   | ■   | ■     | ■   | ■     |
| Liomys spectabilis         | ■     | ■    | ■   | ■   | ■    | ■   | ■   | ■   | ■     | ■   | ■     |
| Liomys irroratus           | ■     | ■    | ■   | ■   | ■    | ■   | ■   | ■   | ■     | ■   | ■     |
| Heteromys nelsoni          | ■     | ■    | ■   | ■   | ■    | ■   | ■   | ■   | ■     | ■   | ■     |
| Heteromys anomalus         | ■     | ■    | ■   | ■   | ■    | ■   | ■   | ■   | ■     | ■   | ■     |
| Heteromys australis        | ■     | ■    | ■   | ■   | ■    | ■   | ■   | ■   | ■     | ■   | ■     |
| Heteromys gaumeri          | ■     | ■    | ■   | ■   | ■    | ■   | ■   | ■   | ■     | ■   | ■     |
| Heteromys desmarestianus   | ■     | ■    | ■   | ■   | ■    | ■   | ■   | ■   | ■     | ■   | ■     |
| Perognathus alticolus      | ■     | ■    | ■   | ■   | ■    | ■   | ■   | ■   | ■     | ■   | ■     |
| Perognathus parvus         | ■     | ■    | ■   | ■   | ■    | ■   | ■   | ■   | ■     | ■   | ■     |
| Perognathus fasciatus      | ■     | ■    | ■   | ■   | ■    | ■   | ■   | ■   | ■     | ■   | ■     |
| Perognathus merriami       | ■     | ■    | ■   | ■   | ■    | ■   | ■   | ■   | ■     | ■   | ■     |
| Perognathus flavescens     | ■     | ■    | ■   | ■   | ■    | ■   | ■   | ■   | ■     | ■   | ■     |
| Perognathus flavus         | ■     | ■    | ■   | ■   | ■    | ■   | ■   | ■   | ■     | ■   | ■     |
| Perognathus amplus         | ■     | ■    | ■   | ■   | ■    | ■   | ■   | ■   | ■     | ■   | ■     |
| Perognathus inornatus      | ■     | ■    | ■   | ■   | ■    | ■   | ■   | ■   | ■     | ■   | ■     |
| Perognathus longimembris   | ■     | ■    | ■   | ■   | ■    | ■   | ■   | ■   | ■     | ■   | ■     |
| Chaetodipus formosus       | ■     | ■    | ■   | ■   | ■    | ■   | ■   | ■   | ■     | ■   | ■     |
| Chaetodipus baileyi        | ■     | ■    | ■   | ■   | ■    | ■   | ■   | ■   | ■     | ■   | ■     |
| Chaetodipus rudinoris      | ■     | ■    | ■   | ■   | ■    | ■   | ■   | ■   | ■     | ■   | ■     |
| Chaetodipus hispidus       | ■     | ■    | ■   | ■   | ■    | ■   | ■   | ■   | ■     | ■   | ■     |
| Chaetodipus eremicus       | ■     | ■    | ■   | ■   | ■    | ■   | ■   | ■   | ■     | ■   | ■     |
| Chaetodipus penicillatus   | ■     | ■    | ■   | ■   | ■    | ■   | ■   | ■   | ■     | ■   | ■     |
| Chaetodipus pernix         | ■     | ■    | ■   | ■   | ■    | ■   | ■   | ■   | ■     | ■   | ■     |
| Chaetodipus intermedius    | ■     | ■    | ■   | ■   | ■    | ■   | ■   | ■   | ■     | ■   | ■     |
| Chaetodipus artus          | ■     | ■    | ■   | ■   | ■    | ■   | ■   | ■   | ■     | ■   | ■     |
| Chaetodipus goldmani       | ■     | ■    | ■   | ■   | ■    | ■   | ■   | ■   | ■     | ■   | ■     |
| Chaetodipus nelsoni        | ■     | ■    | ■   | ■   | ■    | ■   | ■   | ■   | ■     | ■   | ■     |
| Chaetodipus spinatus       | ■     | ■    | ■   | ■   | ■    | ■   | ■   | ■   | ■     | ■   | ■     |
| Chaetodipus californicus   | ■     | ■    | ■   | ■   | ■    | ■   | ■   | ■   | ■     | ■   | ■     |
| Chaetodipus arenarius      | ■     | ■    | ■   | ■   | ■    | ■   | ■   | ■   | ■     | ■   | ■     |
| Chaetodipus fallax         | ■     | ■    | ■   | ■   | ■    | ■   | ■   | ■   | ■     | ■   | ■     |
| Microdipodops pallidus     | ■     | ■    | ■   | ■   | ■    | ■   | ■   | ■   | ■     | ■   | ■     |
| Microdipodops megacephalus | ■     | ■    | ■   | ■   | ■    | ■   | ■   | ■   | ■     | ■   | ■     |
| Dipodomys deserti          | ■     | ■    | ■   | ■   | ■    | ■   | ■   | ■   | ■     | ■   | ■     |
| Dipodomys nelsoni          | ■     | ■    | ■   | ■   | ■    | ■   | ■   | ■   | ■     | ■   | ■     |
| Dipodomys spectabilis      | ■     | ■    | ■   | ■   | ■    | ■   | ■   | ■   | ■     | ■   | ■     |
| Dipodomys phillipsii       | ■     | ■    | ■   | ■   | ■    | ■   | ■   | ■   | ■     | ■   | ■     |
| Dipodomys elator           | ■     | ■    | ■   | ■   | ■    | ■   | ■   | ■   | ■     | ■   | ■     |
| Dipodomys nitratoides      | ■     | ■    | ■   | ■   | ■    | ■   | ■   | ■   | ■     | ■   | ■     |
| Dipodomys merriami         | ■     | ■    | ■   | ■   | ■    | ■   | ■   | ■   | ■     | ■   | ■     |
| Dipodomys ordii            | ■     | ■    | ■   | ■   | ■    | ■   | ■   | ■   | ■     | ■   | ■     |
| Dipodomys compactus        | ■     | ■    | ■   | ■   | ■    | ■   | ■   | ■   | ■     | ■   | ■     |
| Dipodomys californicus     | ■     | ■    | ■   | ■   | ■    | ■   | ■   | ■   | ■     | ■   | ■     |
| Dipodomys agilis           | ■     | ■    | ■   | ■   | ■    | ■   | ■   | ■   | ■     | ■   | ■     |
| Dipodomys simulans         | ■     | ■    | ■   | ■   | ■    | ■   | ■   | ■   | ■     | ■   | ■     |
| Dipodomys venustus         | ■     | ■    | ■   | ■   | ■    | ■   | ■   | ■   | ■     | ■   | ■     |
| Dipodomys gravipes         | ■     | ■    | ■   | ■   | ■    | ■   | ■   | ■   | ■     | ■   | ■     |
| Dipodomys ingens           | ■     | ■    | ■   | ■   | ■    | ■   | ■   | ■   | ■     | ■   | ■     |
| Dipodomys microps          | ■     | ■    | ■   | ■   | ■    | ■   | ■   | ■   | ■     | ■   | ■     |
| Dipodomys stephensi        | ■     | ■    | ■   | ■   | ■    | ■   | ■   | ■   | ■     | ■   | ■     |
| Dipodomys heermanni        | ■     | ■    | ■   | ■   | ■    | ■   | ■   | ■   | ■     | ■   | ■     |
| Dipodomys panamintinus     | ■     | ■    | ■   | ■   | ■    | ■   | ■   | ■   | ■     | ■   | ■     |
| Thomomys talpoides         | ■     | ■    | ■   | ■   | ■    | ■   | ■   | ■   | ■     | ■   | ■     |
| Thomomys mazama            | ■     | ■    | ■   | ■   | ■    | ■   | ■   | ■   | ■     | ■   | ■     |
| Thomomys monticola         | ■     | ■    | ■   | ■   | ■    | ■   | ■   | ■   | ■     | ■   | ■     |
| Thomomys bulbivorus        | ■     | ■    | ■   | ■   | ■    | ■   | ■   | ■   | ■     | ■   | ■     |
| Thomomys umbrinus          | ■     | ■    | ■   | ■   | ■    | ■   | ■   | ■   | ■     | ■   | ■     |
| Thomomys bottae            | ■     | ■    | ■   | ■   | ■    | ■   | ■   | ■   | ■     | ■   | ■     |
| Thomomys townsendii        | ■     | ■    | ■   | ■   | ■    | ■   | ■   | ■   | ■     | ■   | ■     |
| Zygoeomys trichopus        | ■     | ■    | ■   | ■   | ■    | ■   | ■   | ■   | ■     | ■   | ■     |
| Orthogeomys grandis        | ■     | ■    | ■   | ■   | ■    | ■   | ■   | ■   | ■     | ■   | ■     |
| Cratogeomys merriami       | ■     | ■    | ■   | ■   | ■    | ■   | ■   | ■   | ■     | ■   | ■     |
| Cratogeomys castanops      | ■     | ■    | ■   | ■   | ■    | ■   | ■   | ■   | ■     | ■   | ■     |
| Cratogeomys goldmani       | ■     | ■    | ■   | ■   | ■    | ■   | ■   | ■   | ■     | ■   | ■     |
| Cratogeomys fumosus        | ■     | ■    | ■   | ■   | ■    | ■   | ■   | ■   | ■     | ■   | ■     |
| Cratogeomys gymnurus       | ■     | ■    | ■   | ■   | ■    | ■   | ■   | ■   | ■     | ■   | ■     |
| Cratogeomys neglectus      | ■     | ■    | ■   | ■   | ■    | ■   | ■   | ■   | ■     | ■   | ■     |
| Cratogeomys tylorhinus     | ■     | ■    | ■   | ■   | ■    | ■   | ■   | ■   | ■     | ■   | ■     |
| Cratogeomys zinseri        | ■     | ■    | ■   | ■   | ■    | ■   | ■   | ■   | ■     | ■   | ■     |
| Pappogeomys alcorni        | ■     | ■    | ■   | ■   | ■    | ■   | ■   | ■   | ■     | ■   | ■     |
| Pappogeomys bulleri        | ■     | ■    | ■   | ■   | ■    | ■   | ■   | ■   | ■     | ■   | ■     |
| Orthogeomys cavator        | ■     | ■    | ■   | ■   | ■    | ■   | ■   | ■   | ■     | ■   | ■     |
| Orthogeomys heterodus      | ■     | ■    | ■   | ■   | ■    | ■   | ■   | ■   | ■     | ■   | ■     |
| Orthogeomys cherriei       | ■     | ■    | ■   | ■   | ■    | ■   | ■   | ■   | ■     | ■   | ■     |
| Orthogeomys underwoodi     | ■     | ■    | ■   | ■   | ■    | ■   | ■   | ■   | ■     | ■   | ■     |
| Orthogeomys hispidus       | ■     | ■    | ■   | ■   | ■    | ■   | ■   | ■   | ■     | ■   | ■     |
| Geomys pinetis             | ■     | ■    | ■   | ■   | ■    | ■   | ■   | ■   | ■     | ■   | ■     |
| Geomys breviceps           | ■     | ■    | ■   | ■   | ■    | ■   | ■   | ■   | ■     | ■   | ■     |
| Geomys arenarius           | ■     | ■    | ■   | ■   | ■    | ■   | ■   | ■   | ■     | ■   | ■     |
| Geomys knoxjonesi          | ■     | ■    | ■   | ■   | ■    | ■   | ■   | ■   | ■     | ■   | ■     |
| Geomys texensis            | ■     | ■    | ■   | ■   | ■    | ■   | ■   | ■   | ■     | ■   | ■     |
| Geomys bursarius           | ■     | ■    | ■   | ■   | ■    | ■   | ■   | ■   | ■     | ■   | ■     |
| Geomys attwateri           | ■     | ■    | ■   | ■   | ■    | ■   | ■   | ■   | ■     | ■   | ■     |
| Geomys personatus          | ■     | ■    | ■   | ■   | ■    | ■   | ■   | ■   | ■     | ■   | ■     |
| Geomys tropicalis          | ■     | ■    | ■   | ■   | ■    | ■   | ■   | ■   | ■     | ■   | ■     |

**CASTORIMORPHA**

● Bootstrap >= 95  
○ 70 <= Bootstrap < 95  
◐ 50 <= Bootstrap < 70

**CAS**

**HETEROMYIDAE**

**GEOMYIDAE**

▲ 17

▲ 19

▲ 18
