# Supplementary material for: A glimpse on the pattern of rodent diversification: a phylogenetic approach
Source: PubMed Central journal article supplement (PMC3532383; doi:10.1186/1471-2148-12-88), 2012-06-14
Supplement: 1471-2148-12-88-S10.pdf [file 1471-2148-12-88-S10.pdf]

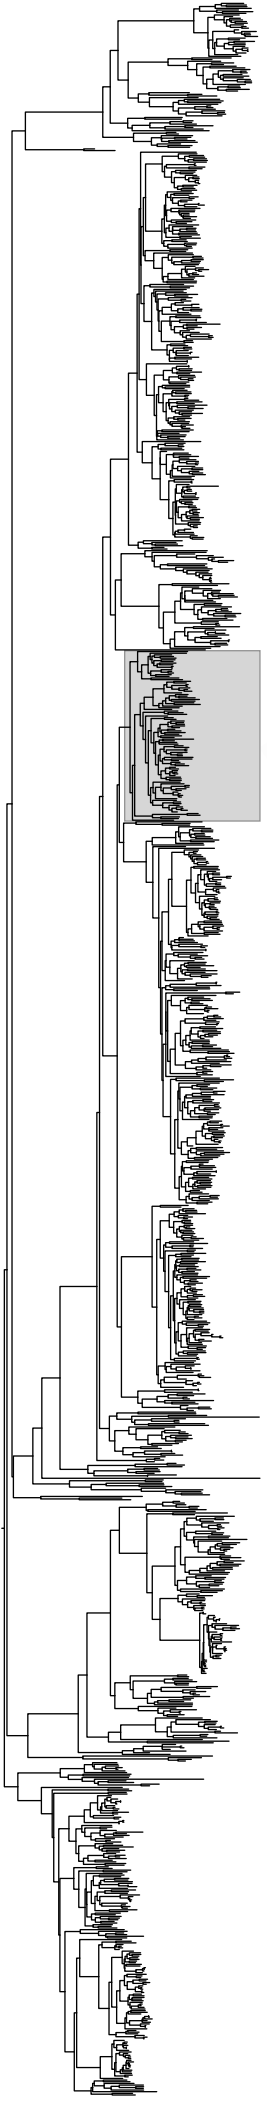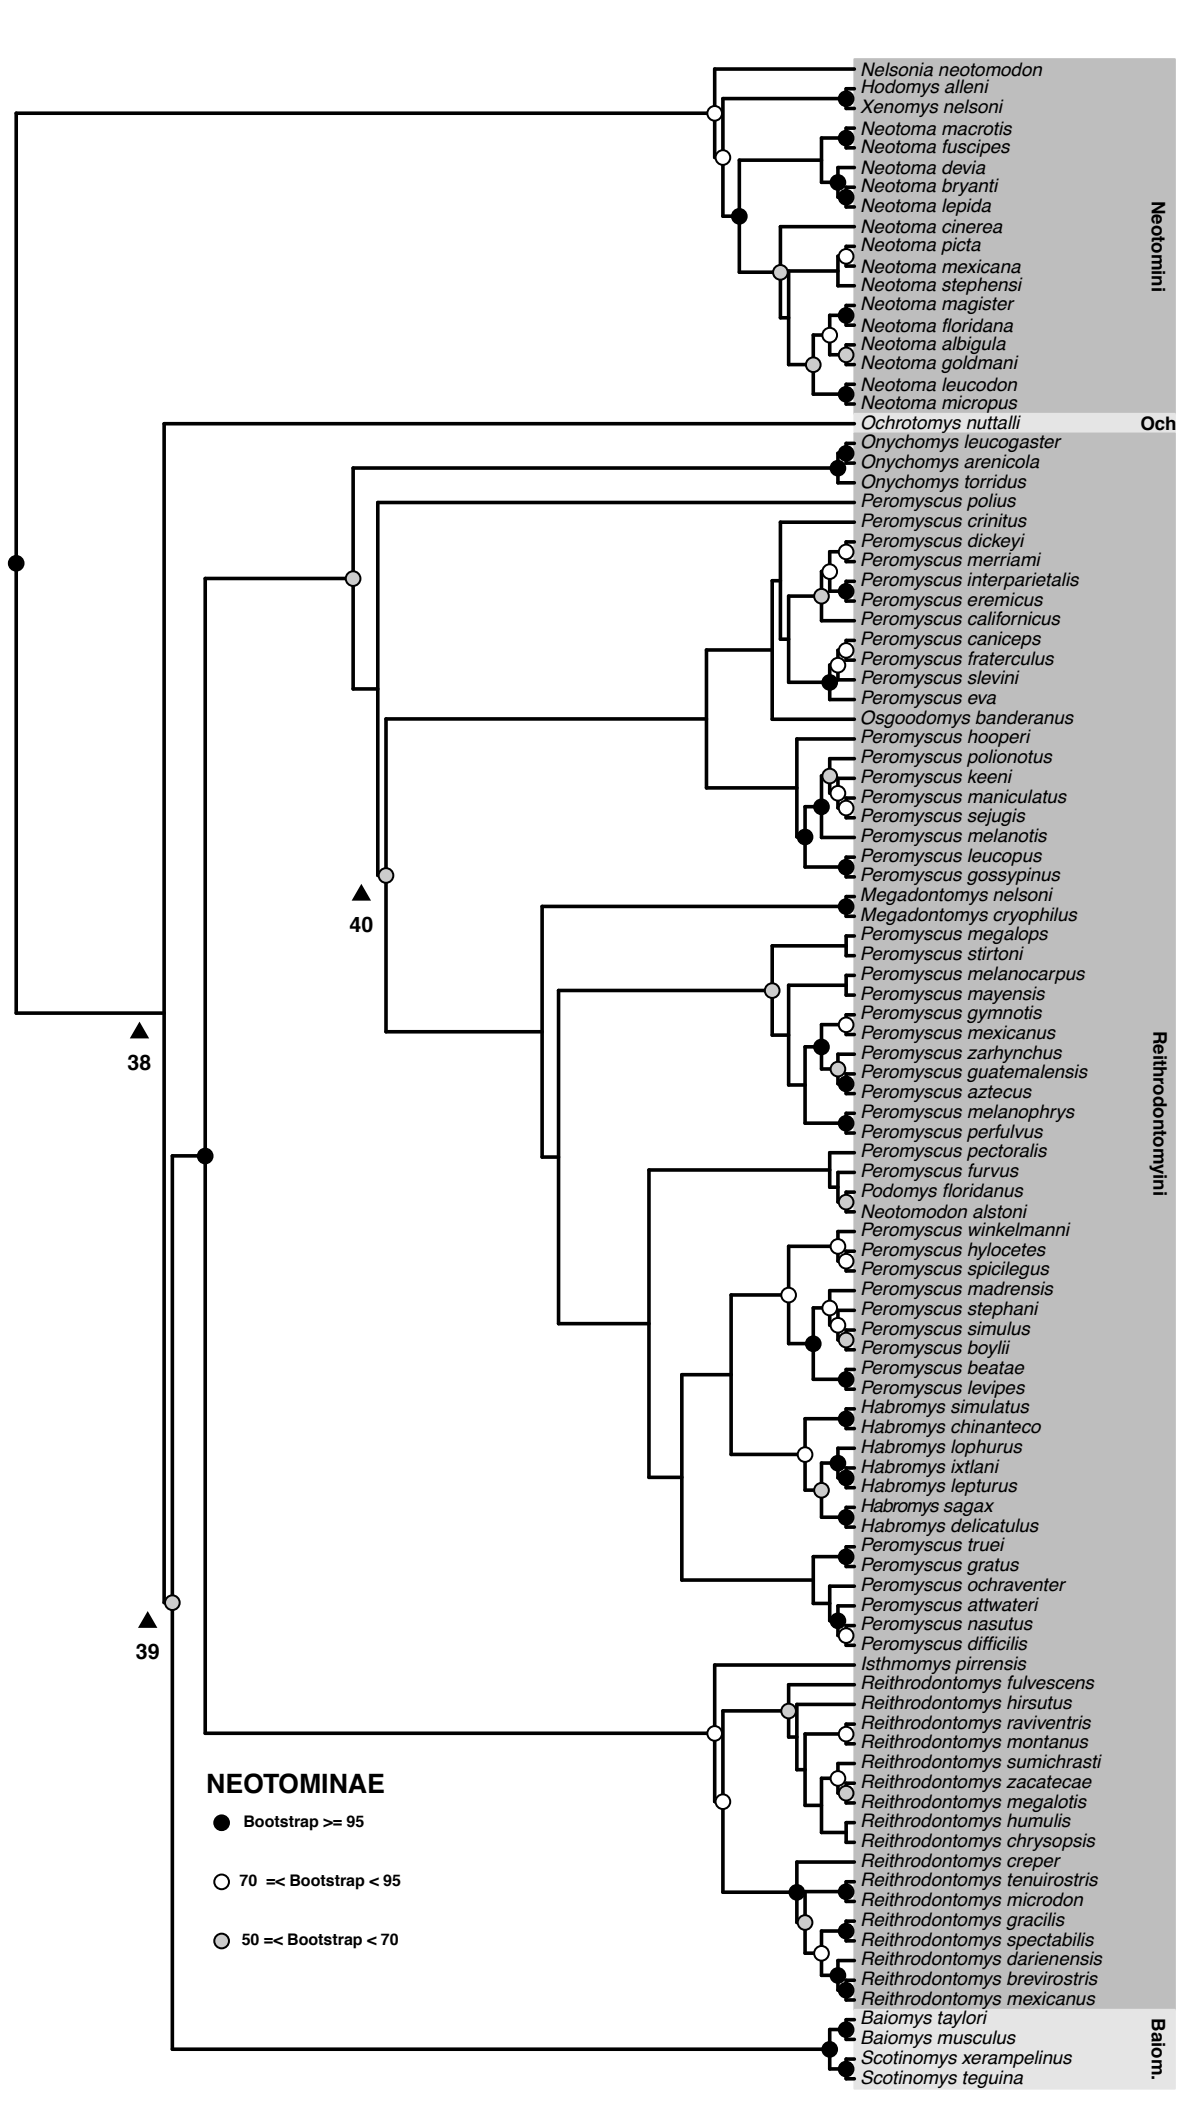

**NEOTOMINAE**

- Bootstrap  $\geq 95$
- $70 \leq$  Bootstrap  $< 95$
- $50 \leq$  Bootstrap  $< 70$

| Species                             | CYTB | IRBP | I2S | GHR | RAG1 | C03 | VWF | ND4 | BRCA1 | ND1 | DL00P |
|-------------------------------------|------|------|-----|-----|------|-----|-----|-----|-------|-----|-------|
| <i>Nelsonia neotomodon</i>          |      |      |     |     |      |     |     |     |       |     |       |
| <i>Hodomys alleni</i>               |      |      |     |     |      |     |     |     |       |     |       |
| <i>Xenomys nelsoni</i>              |      |      |     |     |      |     |     |     |       |     |       |
| <i>Neotoma macrotis</i>             |      |      |     |     |      |     |     |     |       |     |       |
| <i>Neotoma fuscipes</i>             |      |      |     |     |      |     |     |     |       |     |       |
| <i>Neotoma devia</i>                |      |      |     |     |      |     |     |     |       |     |       |
| <i>Neotoma bryanti</i>              |      |      |     |     |      |     |     |     |       |     |       |
| <i>Neotoma lepida</i>               |      |      |     |     |      |     |     |     |       |     |       |
| <i>Neotoma cinerea</i>              |      |      |     |     |      |     |     |     |       |     |       |
| <i>Neotoma picta</i>                |      |      |     |     |      |     |     |     |       |     |       |
| <i>Neotoma mexicana</i>             |      |      |     |     |      |     |     |     |       |     |       |
| <i>Neotoma stephensi</i>            |      |      |     |     |      |     |     |     |       |     |       |
| <i>Neotoma magister</i>             |      |      |     |     |      |     |     |     |       |     |       |
| <i>Neotoma floridana</i>            |      |      |     |     |      |     |     |     |       |     |       |
| <i>Neotoma albigula</i>             |      |      |     |     |      |     |     |     |       |     |       |
| <i>Neotoma goldmani</i>             |      |      |     |     |      |     |     |     |       |     |       |
| <i>Neotoma leucodon</i>             |      |      |     |     |      |     |     |     |       |     |       |
| <i>Neotoma micropus</i>             |      |      |     |     |      |     |     |     |       |     |       |
| <i>Ochrotomys nuttalli</i>          |      |      |     |     |      |     |     |     |       |     |       |
| <i>Onychomys leucogaster</i>        |      |      |     |     |      |     |     |     |       |     |       |
| <i>Onychomys arenicola</i>          |      |      |     |     |      |     |     |     |       |     |       |
| <i>Onychomys torridus</i>           |      |      |     |     |      |     |     |     |       |     |       |
| <i>Peromyscus polius</i>            |      |      |     |     |      |     |     |     |       |     |       |
| <i>Peromyscus crinitus</i>          |      |      |     |     |      |     |     |     |       |     |       |
| <i>Peromyscus dickeyi</i>           |      |      |     |     |      |     |     |     |       |     |       |
| <i>Peromyscus merriami</i>          |      |      |     |     |      |     |     |     |       |     |       |
| <i>Peromyscus interparietalis</i>   |      |      |     |     |      |     |     |     |       |     |       |
| <i>Peromyscus eremicus</i>          |      |      |     |     |      |     |     |     |       |     |       |
| <i>Peromyscus californicus</i>      |      |      |     |     |      |     |     |     |       |     |       |
| <i>Peromyscus caniceps</i>          |      |      |     |     |      |     |     |     |       |     |       |
| <i>Peromyscus fraterculus</i>       |      |      |     |     |      |     |     |     |       |     |       |
| <i>Peromyscus slevini</i>           |      |      |     |     |      |     |     |     |       |     |       |
| <i>Peromyscus eva</i>               |      |      |     |     |      |     |     |     |       |     |       |
| <i>Osgoodomys banderanus</i>        |      |      |     |     |      |     |     |     |       |     |       |
| <i>Peromyscus hooperi</i>           |      |      |     |     |      |     |     |     |       |     |       |
| <i>Peromyscus polionotus</i>        |      |      |     |     |      |     |     |     |       |     |       |
| <i>Peromyscus keeni</i>             |      |      |     |     |      |     |     |     |       |     |       |
| <i>Peromyscus maniculatus</i>       |      |      |     |     |      |     |     |     |       |     |       |
| <i>Peromyscus sejugis</i>           |      |      |     |     |      |     |     |     |       |     |       |
| <i>Peromyscus melanotis</i>         |      |      |     |     |      |     |     |     |       |     |       |
| <i>Peromyscus leucopus</i>          |      |      |     |     |      |     |     |     |       |     |       |
| <i>Peromyscus gossypinus</i>        |      |      |     |     |      |     |     |     |       |     |       |
| <i>Megadontomys nelsoni</i>         |      |      |     |     |      |     |     |     |       |     |       |
| <i>Megadontomys cryophilus</i>      |      |      |     |     |      |     |     |     |       |     |       |
| <i>Peromyscus megalops</i>          |      |      |     |     |      |     |     |     |       |     |       |
| <i>Peromyscus stirtoni</i>          |      |      |     |     |      |     |     |     |       |     |       |
| <i>Peromyscus melanocarpus</i>      |      |      |     |     |      |     |     |     |       |     |       |
| <i>Peromyscus mayensis</i>          |      |      |     |     |      |     |     |     |       |     |       |
| <i>Peromyscus gymnotis</i>          |      |      |     |     |      |     |     |     |       |     |       |
| <i>Peromyscus mexicanus</i>         |      |      |     |     |      |     |     |     |       |     |       |
| <i>Peromyscus zarhynchus</i>        |      |      |     |     |      |     |     |     |       |     |       |
| <i>Peromyscus guatemalensis</i>     |      |      |     |     |      |     |     |     |       |     |       |
| <i>Peromyscus aztecus</i>           |      |      |     |     |      |     |     |     |       |     |       |
| <i>Peromyscus melanophrys</i>       |      |      |     |     |      |     |     |     |       |     |       |
| <i>Peromyscus perfulvus</i>         |      |      |     |     |      |     |     |     |       |     |       |
| <i>Peromyscus pectoralis</i>        |      |      |     |     |      |     |     |     |       |     |       |
| <i>Peromyscus furvus</i>            |      |      |     |     |      |     |     |     |       |     |       |
| <i>Podomys floridanus</i>           |      |      |     |     |      |     |     |     |       |     |       |
| <i>Neotomodon alstoni</i>           |      |      |     |     |      |     |     |     |       |     |       |
| <i>Peromyscus winkelmanni</i>       |      |      |     |     |      |     |     |     |       |     |       |
| <i>Peromyscus hylocetes</i>         |      |      |     |     |      |     |     |     |       |     |       |
| <i>Peromyscus spicilegus</i>        |      |      |     |     |      |     |     |     |       |     |       |
| <i>Peromyscus madrensis</i>         |      |      |     |     |      |     |     |     |       |     |       |
| <i>Peromyscus stephani</i>          |      |      |     |     |      |     |     |     |       |     |       |
| <i>Peromyscus simulus</i>           |      |      |     |     |      |     |     |     |       |     |       |
| <i>Peromyscus boylii</i>            |      |      |     |     |      |     |     |     |       |     |       |
| <i>Peromyscus beatae</i>            |      |      |     |     |      |     |     |     |       |     |       |
| <i>Peromyscus levipes</i>           |      |      |     |     |      |     |     |     |       |     |       |
| <i>Habromys simulatus</i>           |      |      |     |     |      |     |     |     |       |     |       |
| <i>Habromys chinanteco</i>          |      |      |     |     |      |     |     |     |       |     |       |
| <i>Habromys lophurus</i>            |      |      |     |     |      |     |     |     |       |     |       |
| <i>Habromys ixtlani</i>             |      |      |     |     |      |     |     |     |       |     |       |
| <i>Habromys lepturus</i>            |      |      |     |     |      |     |     |     |       |     |       |
| <i>Habromys sagax</i>               |      |      |     |     |      |     |     |     |       |     |       |
| <i>Habromys delicatulus</i>         |      |      |     |     |      |     |     |     |       |     |       |
| <i>Peromyscus truei</i>             |      |      |     |     |      |     |     |     |       |     |       |
| <i>Peromyscus gratus</i>            |      |      |     |     |      |     |     |     |       |     |       |
| <i>Peromyscus ochraventer</i>       |      |      |     |     |      |     |     |     |       |     |       |
| <i>Peromyscus attwateri</i>         |      |      |     |     |      |     |     |     |       |     |       |
| <i>Peromyscus nasutus</i>           |      |      |     |     |      |     |     |     |       |     |       |
| <i>Peromyscus difficilis</i>        |      |      |     |     |      |     |     |     |       |     |       |
| <i>Isthomys pirrensis</i>           |      |      |     |     |      |     |     |     |       |     |       |
| <i>Reithrodontomys fulvescens</i>   |      |      |     |     |      |     |     |     |       |     |       |
| <i>Reithrodontomys hirsutus</i>     |      |      |     |     |      |     |     |     |       |     |       |
| <i>Reithrodontomys raviventris</i>  |      |      |     |     |      |     |     |     |       |     |       |
| <i>Reithrodontomys montanus</i>     |      |      |     |     |      |     |     |     |       |     |       |
| <i>Reithrodontomys sumichrasti</i>  |      |      |     |     |      |     |     |     |       |     |       |
| <i>Reithrodontomys zacatecae</i>    |      |      |     |     |      |     |     |     |       |     |       |
| <i>Reithrodontomys megalotis</i>    |      |      |     |     |      |     |     |     |       |     |       |
| <i>Reithrodontomys humulis</i>      |      |      |     |     |      |     |     |     |       |     |       |
| <i>Reithrodontomys chrysopsis</i>   |      |      |     |     |      |     |     |     |       |     |       |
| <i>Reithrodontomys creper</i>       |      |      |     |     |      |     |     |     |       |     |       |
| <i>Reithrodontomys tenuirostris</i> |      |      |     |     |      |     |     |     |       |     |       |
| <i>Reithrodontomys microdon</i>     |      |      |     |     |      |     |     |     |       |     |       |
| <i>Reithrodontomys gracilis</i>     |      |      |     |     |      |     |     |     |       |     |       |
| <i>Reithrodontomys spectabilis</i>  |      |      |     |     |      |     |     |     |       |     |       |
| <i>Reithrodontomys darienensis</i>  |      |      |     |     |      |     |     |     |       |     |       |
| <i>Reithrodontomys brevirostris</i> |      |      |     |     |      |     |     |     |       |     |       |
| <i>Reithrodontomys mexicanus</i>    |      |      |     |     |      |     |     |     |       |     |       |
| <i>Baiomys taylori</i>              |      |      |     |     |      |     |     |     |       |     |       |
| <i>Baiomys musculus</i>             |      |      |     |     |      |     |     |     |       |     |       |
| <i>Scotinomys xerampelinus</i>      |      |      |     |     |      |     |     |     |       |     |       |
| <i>Scotinomys teguina</i>           |      |      |     |     |      |     |     |     |       |     |       |

Neotomini

Och

Reithodontomyini

Baiom.
